# Supplementary figures and images for: A polyaniline-coated ZnS/ZnO/FTO photoelectrode for improving photocorrosion prevention and visible light absorption
Source: Royal Society of Chemistry journal article supplement (doi:10.1039/c9nj04290c), 2019-01-01

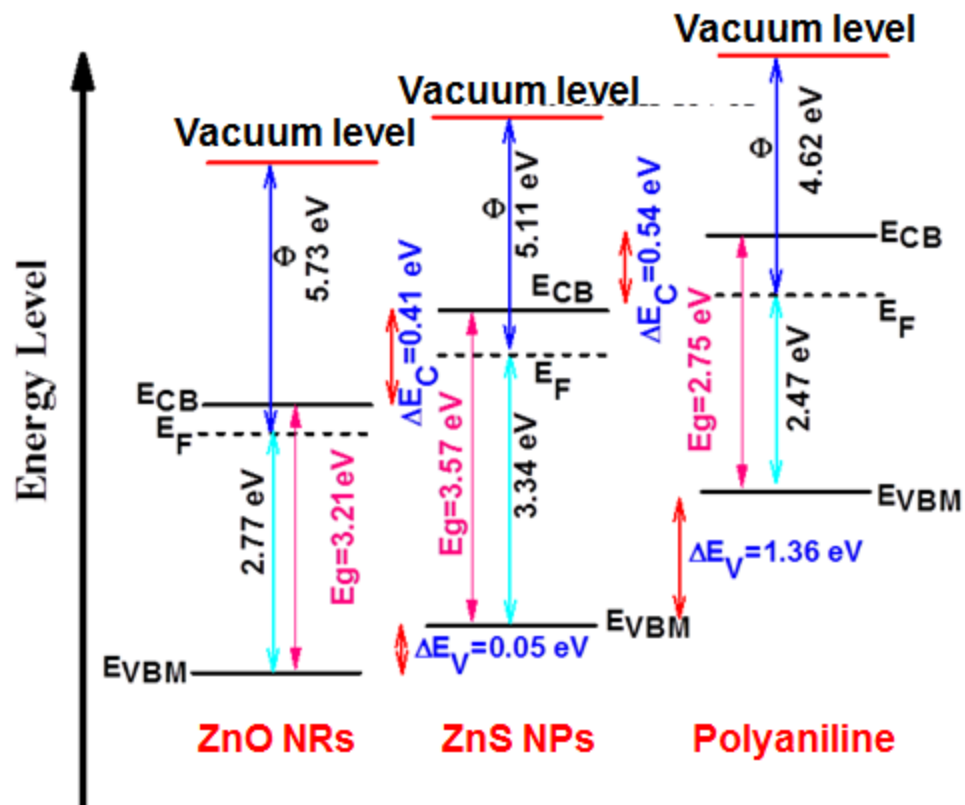

Fig. 1S. Schematic band alignment diagram of ZnO NRs, ZnS NPs and PANI.

Supplement: c9nj04290c1.pdf [file c9nj04290c1.pdf]
